# Supplementary material for: A flexible, water anchoring, and colorimetric ionogel for sweat monitoring
Source: Royal Society of Chemistry journal article supplement (doi:10.1039/d4bm01482k), 2024-12-19
Supplement: d4bm01482k5.pdf [file d4bm01482k5.pdf]

## Supporting Information

# A flexible, water anchoring, and colorimetric ionogel for sweat monitoring

*Hui Zhi*<sup>a</sup>, *Yingxi Qin*<sup>a,b</sup>, *Yang Li*<sup>a,c</sup>, *Fengya Wang*<sup>d</sup>, and *Liang Feng*<sup>a\*</sup>

a Department of Instrumentation and Analytical Chemistry, CAS Key Laboratory of Separation Science for Analytical Chemistry, Dalian Institute of Chemical Physics, Chinese Academy of Sciences, Dalian 116023, P. R. China

E-mail: fengl@dicp.ac.cn

b University of Chinese Academy of Sciences, Beijing 100049, P. R. China

c Dalian Jiaotong University, Dalian 116028, P. R. China

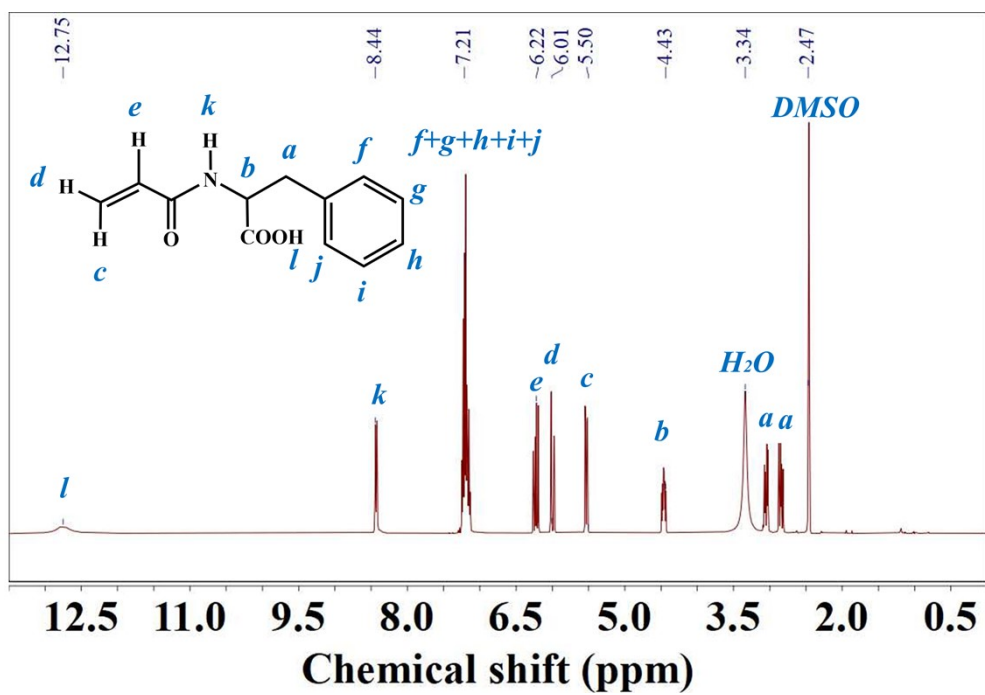

Figure s1. <sup>1</sup>H NMR spectrum of N-acryloyl phenylalanine in DMSO-d<sub>6</sub>.

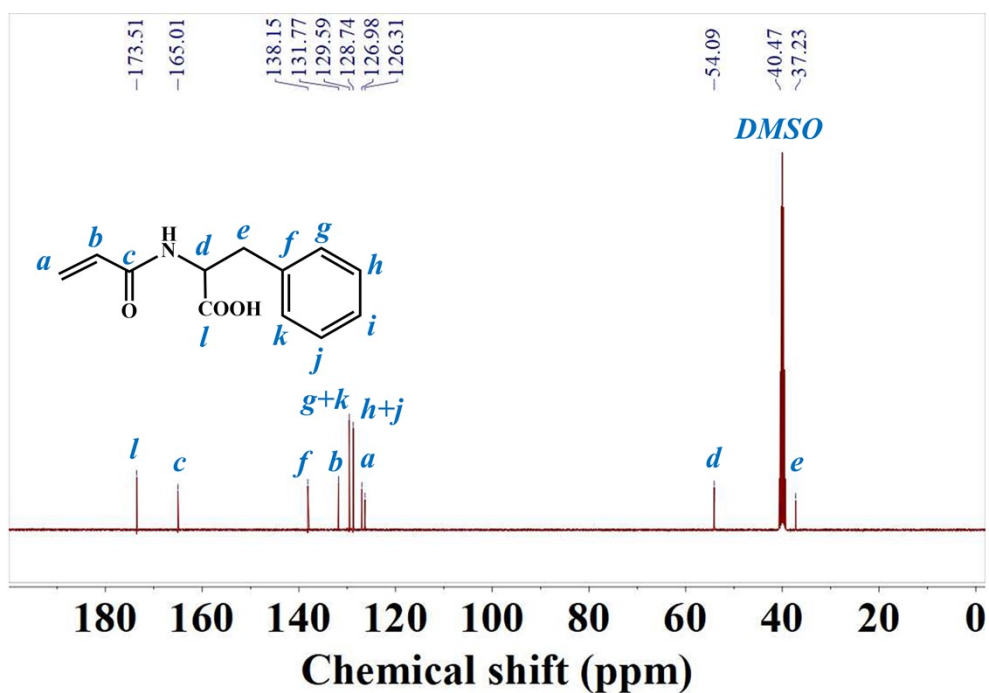

Figure s2. <sup>13</sup>C NMR spectrum of N-acryloyl phenylalanine in DMSO-d<sub>6</sub>.
